# Supplementary material
Source: HighWire-hosted journal article supplement (https://cmaj.ca/highwire/filestream/74170/field_highwire_adjunct_files/1/190355-res-2-at.pdf)
Supplement: 190355-res-2-at.pdf [file 190355-res-2-at.pdf]

**Appendix 2 (as supplied by the authors):** Cancer incidence of selected cancer sites from 1971 to 2015 by sex and age

| Cancer site             | Sex    | Age   |        |         |         |         |         |         |
|-------------------------|--------|-------|--------|---------|---------|---------|---------|---------|
|                         |        | 20-29 | 30-39  | 40-49   | 50-59   | 60-69   | 70-79   | 80-89   |
|                         |        | N     |        |         |         |         |         |         |
| Anus                    | Female | 25    | 250    | 1,025   | 2,075   | 2,245   | 1,995   | 1,465   |
|                         | Male   | 40    | 190    | 750     | 1,450   | 1,855   | 1,535   | 850     |
| Bladder                 | Female | 270   | 975    | 2,815   | 8,015   | 14,115  | 17,895  | 15,335  |
|                         | Male   | 585   | 2,115  | 7,660   | 23,800  | 48,855  | 58,755  | 35,655  |
| Breast                  | Female | 4,050 | 35,865 | 117,260 | 162,745 | 170,115 | 132,200 | 77,195  |
| Cervix Uteri            | Female | 5,060 | 14,275 | 14,710  | 11,615  | 9,550   | 6,320   | 3,485   |
| Colorectal              | Female | 1,175 | 4,950  | 18,125  | 45,485  | 75,575  | 96,120  | 83,190  |
|                         | Male   | 1,245 | 5,175  | 19,485  | 58,055  | 105,390 | 112,850 | 61,695  |
| Endometrium             | Female | 520   | 3,340  | 12,970  | 40,925  | 49,190  | 32,555  | 14,320  |
| Kidney and Renal Pelvis | Female | 435   | 1,570  | 4,715   | 9,915   | 12,925  | 12,840  | 8,260   |
|                         | Male   | 375   | 2,315  | 8,910   | 18,230  | 24,175  | 19,990  | 8,555   |
| Liver                   | Female | 140   | 220    | 605     | 1,520   | 2,770   | 3,600   | 2,625   |
|                         | Male   | 155   | 580    | 2,095   | 6,480   | 9,365   | 8,305   | 3,440   |
| Lung and Bronchus       | Female | 380   | 2,780  | 17,740  | 51,255  | 85,555  | 86,450  | 44,040  |
|                         | Male   | 375   | 2,600  | 18,865  | 75,655  | 153,195 | 154,190 | 65,970  |
| Skin Melanoma           | Female | 4,640 | 8,925  | 12,165  | 12,925  | 12,085  | 9,875   | 6,970   |
|                         | Male   | 2,575 | 6,145  | 9,980   | 14,470  | 16,900  | 14,340  | 8,065   |
| Non-Hodgkin's lymphoma  | Female | 1,830 | 4,030  | 7,980   | 15,105  | 21,700  | 23,500  | 16,235  |
|                         | Male   | 2,875 | 6,220  | 11,875  | 19,410  | 26,125  | 25,430  | 13,375  |
| Ovary                   | Female | 2,235 | 4,485  | 12,015  | 19,555  | 21,365  | 18,320  | 11,095  |
| Pancreas                | Female | 110   | 560    | 2,590   | 7,430   | 14,665  | 20,440  | 18,000  |
|                         | Male   | 140   | 715    | 3,680   | 11,080  | 19,750  | 20,965  | 11,760  |
| Prostate                | Male   | 40    | 180    | 8,215   | 79,815  | 212,510 | 209,325 | 101,055 |
| Stomach                 | Female | 235   | 1,130  | 2,900   | 5,700   | 9,775   | 14,415  | 13,850  |
|                         | Male   | 255   | 1,360  | 4,965   | 12,860  | 22,915  | 26,325  | 15,390  |
| Thyroid                 | Female | 7,530 | 14,760 | 17,470  | 15,650  | 10,655  | 5,955   | 2,410   |
|                         | Male   | 1,720 | 3,565  | 4,685   | 5,325   | 4,620   | 2,765   | 825     |
